# Supplementary material for: Differences in SARS-CoV-2-Specific Antibody Responses After the First, Second, and Third Doses of BNT162b2 in Naïve and Previously Infected Individuals: A 1-Year Observational Study in Healthcare Professionals
Source: PubMed Central journal article supplement (PMC9196038; doi:10.3389/fimmu.2022.876533), 2022-05-27
Supplement: Table_1.pdf [file Table_1.pdf]

Supplementary Table 1 | Mixed-model analysis of variables (age, sex, body mass index (BMI), previous infection and time) and anti-S antibody concentrations in group 1, group 2 and group 3, presented first for the entire group and then for the naïve individuals only.

|                    |           | Group 1  |            |        |        |              |                                                        |                 |                   |            |        |        |              |                                                        |                |
|--------------------|-----------|----------|------------|--------|--------|--------------|--------------------------------------------------------|-----------------|-------------------|------------|--------|--------|--------------|--------------------------------------------------------|----------------|
|                    |           | all      |            |        |        |              |                                                        |                 | naïve individuals |            |        |        |              |                                                        |                |
|                    |           | Estimate | Std. Error | df     | t      | Sig.         | 95% Confidence Interval<br>(lower bound - upper bound) |                 | Estimate          | Std. Error | df     | t      | Sig.         | 95% Confidence Interval<br>(lower bound - upper bound) |                |
| age                | <45 years | 1595.02  | 793.28     | 34.81  | 2.01   | 0.052        | -15.73                                                 | 3205.77         | 1059.00           | 474.17     | 23.70  | 2.23   | <b>0.035</b> | <b>79.72</b>                                           | <b>2038.28</b> |
|                    | >45 years | 0.00     | 0.00       |        |        |              |                                                        |                 | 0.00              | 0.00       |        |        |              |                                                        |                |
| sex                | female    | 1364.78  | 1039.79    | 34.79  | 1.31   | 0.198        | -746.57                                                | 3476.12         | -48.65            | 616.67     | 23.64  | -0.08  | 0.938        | -1322.42                                               | 1225.12        |
|                    | male      | 0.00     | 0.00       |        |        |              |                                                        |                 | 0.00              | 0.00       |        |        |              |                                                        |                |
| BMI                | <25       | 428.97   | 832.97     | 34.76  | 0.51   | 0.610        | -1262.47                                               | 2120.40         | 82.97             | 509.14     | 23.69  | 0.16   | 0.872        | -968.56                                                | 1134.51        |
|                    | >25       | 0.00     | 0.00       |        |        |              |                                                        |                 | 0.00              | 0.00       |        |        |              |                                                        |                |
| previous infection | no        | -3941.66 | 889.38     | 34.81  | -4.43  | <b>0.000</b> | <b>-5747.56</b>                                        | <b>-2135.77</b> |                   |            |        |        |              |                                                        |                |
|                    | yes       | 0.00     | 0.00       |        |        |              |                                                        |                 |                   |            |        |        |              |                                                        |                |
| time               |           | 83.22    | 24.78      | 41.70  | 3.36   | <b>0.002</b> | <b>33.20</b>                                           | <b>133.23</b>   | 126.70            | 15.79      | 27.91  | 8.02   | <b>0.000</b> | <b>94.35</b>                                           | <b>159.06</b>  |
|                    |           | Group 2  |            |        |        |              |                                                        |                 |                   |            |        |        |              |                                                        |                |
| age                | <45 years | 398.58   | 167.66     | 244.72 | 2.38   | <b>0.018</b> | <b>68.35</b>                                           | <b>728.82</b>   | 341.93            | 166.97     | 211.56 | 2.05   | <b>0.042</b> | <b>12.80</b>                                           | <b>671.06</b>  |
|                    | >45 years | 0.00     | 0.00       |        |        |              |                                                        |                 | 0.00              | 0.00       |        |        |              |                                                        |                |
| sex                | female    | 356.38   | 206.71     | 249.51 | 1.72   | 0.086        | -50.73                                                 | 763.50          | 161.93            | 206.01     | 215.00 | 0.79   | 0.433        | -244.13                                                | 567.99         |
|                    | male      | 0.00     | 0.00       |        |        |              |                                                        |                 | 0.00              | 0.00       |        |        |              |                                                        |                |
| BMI                | <25       | -213.11  | 164.80     | 243.38 | -1.29  | 0.197        | -537.73                                                | 111.51          | -147.16           | 165.39     | 210.14 | -0.89  | 0.375        | -473.20                                                | 178.87         |
|                    | >25       | 0.00     | 0.00       |        |        |              |                                                        |                 | 0.00              | 0.00       |        |        |              |                                                        |                |
| previous infection | no        | -938.32  | 242.70     | 264.84 | -3.87  | <b>0.000</b> | <b>-1416.18</b>                                        | <b>-460.46</b>  |                   |            |        |        |              |                                                        |                |
|                    | yes       | 0.00     | 0.00       |        |        |              |                                                        |                 |                   |            |        |        |              |                                                        |                |
| time               |           | -15.58   | 0.72       | 979.01 | -21.62 | <b>0.000</b> | <b>-16.997</b>                                         | <b>-14.168</b>  | -14.68            | 0.72       | 857.66 | -20.48 | <b>0.000</b> | <b>-16.09</b>                                          | <b>-13.27</b>  |
|                    |           | Group 3  |            |        |        |              |                                                        |                 |                   |            |        |        |              |                                                        |                |
| age                | <45 years | -1205.89 | 528.46     | 99.76  | -2.28  | <b>0.025</b> | <b>-2254.38</b>                                        | <b>-157.40</b>  | -1069.34          | 567.37     | 91.24  | -1.88  | 0.063        | -2196.32                                               | 57.64          |
|                    | >45 years | 0.00     | 0.00       |        |        |              |                                                        |                 | 0.00              | 0.00       |        |        |              |                                                        |                |
| sex                | female    | -25.49   | 664.77     | 92.76  | -0.04  | 0.969        | -1345.64                                               | 1294.65         | -55.99            | 706.66     | 83.79  | -0.08  | 0.937        | -1461.31                                               | 1349.34        |
|                    | male      | 0.00     | 0.00       |        |        |              |                                                        |                 | 0.00              | 0.00       |        |        |              |                                                        |                |
| BMI                | <25       | -1717.47 | 537.22     | 105.71 | -3.20  | <b>0.002</b> | <b>-2782.58</b>                                        | <b>-652.35</b>  | -1637.60          | 574.98     | 94.46  | -2.85  | <b>0.005</b> | -2779.16                                               | -496.04        |
|                    | >25       | 0.00     | 0.00       |        |        |              |                                                        |                 | 0.00              | 0.00       |        |        |              |                                                        |                |
| previous infection | no        | -522.62  | 877.14     | 97.73  | -0.60  | 0.553        | -2263.33                                               | 1218.09         |                   |            |        |        |              |                                                        |                |
|                    | yes       | 0.00     | 0.00       |        |        |              |                                                        |                 |                   |            |        |        |              |                                                        |                |
| time               |           | -8.40    | 3.52       | 148.30 | -2.39  | <b>0.018</b> | <b>-15.36</b>                                          | <b>-1.45</b>    | -7.25             | 3.65       | 132.60 | -1.99  | <b>0.049</b> | <b>-14.47</b>                                          | <b>-0.04</b>   |
